# Supplementary material for: Overexpression of Plasma Membrane H+-ATPase in Guard Cells Enhances Light-Induced Stomatal Opening, Photosynthesis, and Plant Growth in Hybrid Aspen
Source: PubMed Central journal article supplement (PMC8663642; doi:10.3389/fpls.2021.766037), 2021-11-26
Supplement: Data_Sheet_1.pdf [file Data_Sheet_1.pdf]

## Supplementary Figure 1

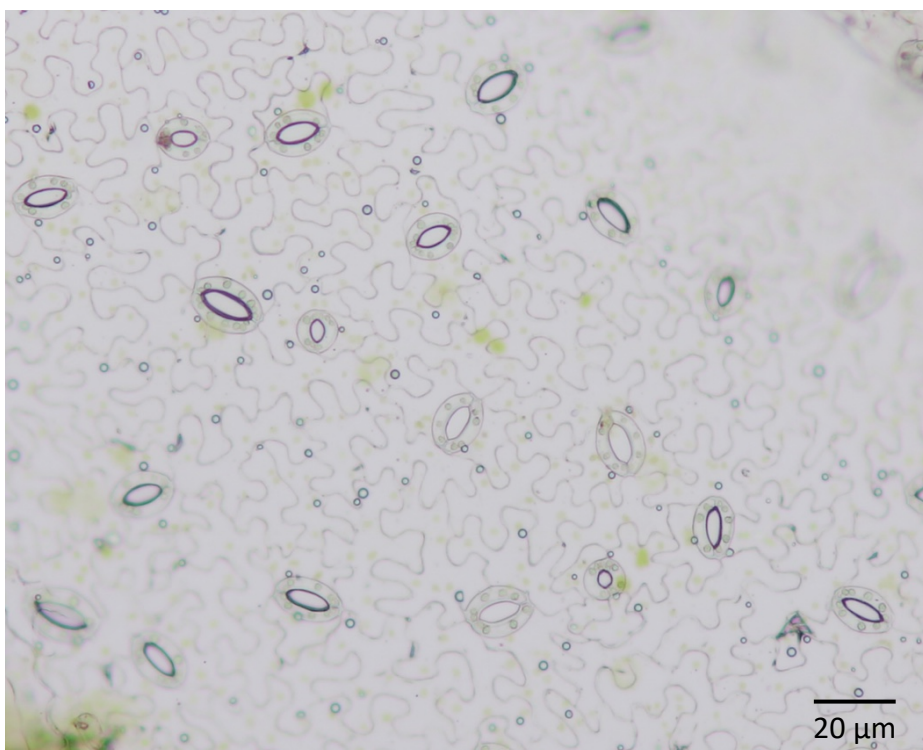

**Supplementary Figure 1.** Abaxial leaf epidermis of hybrid aspens. The variation in size of epidermal pores prevented quantification of the stomatal aperture.

## Supplementary Figure 2

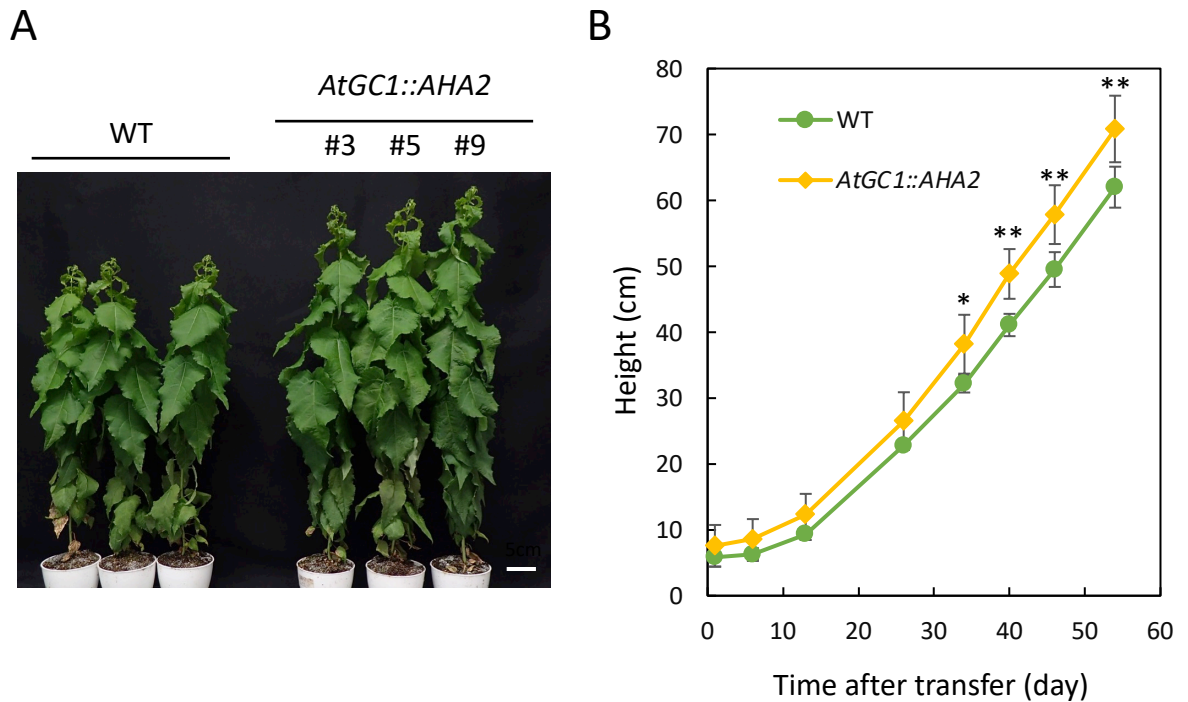

**Supplemental Figure 2.** Growth of *AtGC1::AHA2* transgenic and wild-type (WT) plants in the indoor plant growth room. (A) Phenotypes of 46-day-old *AtGC1::AHA2* transgenic and WT plants. (B) Height of transgenic and WT plants against time over 54 days of growth. Data are means of three *AtGC1::AHA2* transgenic plants. Each transgenic line has two individual plants. Error bars represent SD and are not shown if smaller than the symbols. Asterisks denote a mean significantly higher than the WT (two-tailed *t*-test; \* $P < 0.05$ , \*\* $P < 0.01$ ).

**Supplementary Table 1.** Sequences of primers for reverse transcription PCR.

| Gene           |    | Sequence                |
|----------------|----|-------------------------|
| <i>AHA2</i>    | Fw | TTGTTGAACGTCCTGGAGCA    |
|                | Rv | CTACACAGTGTAGTGACTGGGAG |
| <i>UBQ</i>     | Fw | GGTTGATTTTTGCTGGGAAGC   |
|                | Rv | TTAAGGCTTGCAATGGAATGG   |
| <i>PtxtHA2</i> | Fw | TAATGTCTGCTTTCATGATTGC  |
|                | Rv | GGGTTTGTTCATTGAACTTTAGG |

**Supplementary Table 2.** Comparison of *Populus trichocarpa* PM H<sup>+</sup>-ATPase isoforms with AHA2.

|                  | Identity (%) |
|------------------|--------------|
| <i>PotriHA1</i>  | 85.73%       |
| <i>PotriHA2</i>  | 82.38%       |
| <i>PotriHA3</i>  | 83.10%       |
| <i>PotriHA4</i>  | 82.38%       |
| <i>PotriHA5</i>  | 80.71%       |
| <i>PotriHA6</i>  | 80.33%       |
| <i>PotriHA7</i>  | 79.92%       |
| <i>PotriHA8</i>  | 76.82%       |
| <i>PotriHA9</i>  | 78.49%       |
| <i>PotriHA10</i> | 78.15%       |
| <i>PotriHA11</i> | 77.79%       |
| <i>PotriHA12</i> | 73.64%       |
| <i>PotriHA13</i> | 75.34%       |

**Supplementary Table 3.** Stomatal density in WT and *AtGC1::AHA2* transgenic hybrid aspens.

| Genotype             | Density<br>(number of stomata<br>per mm <sup>2</sup> ) | SD     | <i>p</i> value |
|----------------------|--------------------------------------------------------|--------|----------------|
| WT                   | 196.3                                                  | ± 18.1 |                |
| <i>AtGC1:AHA2</i> #3 | 203.5                                                  | ± 33.9 | 0.763          |
| <i>AtGC1:AHA2</i> #5 | 217.8                                                  | ± 18.1 | 0.218          |
| <i>AtGC1:AHA2</i> #9 | 203.5                                                  | ± 33.2 | 0.758          |

Stomatal density was counted in abaxial epidermis from mature leaves. Data represent means of densities in 3 different leaves. *p* value were calculated using Student's *t* test (two-sided) compared with WT and each transgenic hybrid aspens.
